# Supplementary material for: Dumbbell-shaped nanorod assembly of a NiO/CuO composite for high-performance redox-active battery-type supercapacitor electrodes
Source: Royal Society of Chemistry journal article supplement (doi:10.1039/d5ce00055f), 2025-01-01
Supplement: d5ce00055f1.pdf [file d5ce00055f1.pdf]

## Supporting Information

### **Dumbbell-Shaped Nanorods Assembly of NiO/CuO Composite for High-Performance Redox-Active Battery-Type Supercapacitor Electrodes**

Mulla Jakeer Hussain<sup>a</sup>, Mohamed A. Ghanem<sup>b</sup>, Y. Veera Manohara Reddy<sup>c</sup>, G. Madhavi<sup>a\*</sup>, Sang Woo Joo<sup>d\*</sup>,  
and Gutturu Rajasekhara Reddy<sup>d\*</sup>

<sup>a</sup>*Department of Chemistry, Sri Venkateswara University, Tirupati, 516380, India*

<sup>b</sup>*Chemistry Department, College of Science, King Saud University, Riyadh, 11451, Saudi Arabia*

<sup>c</sup>*Department of Chemistry, Sri Venkateswara College (University of Delhi), New Delhi 110021, India*

<sup>d</sup>*School of Mechanical Engineering, Yeungnam University, Gyeongsan 38541, Republic of Korea*

\*Corresponding author's email: gmchem01@gmail.com

swjoo@yu.ac.kr

guttururajasekharareddy@gmail.com

## **1. Experimental section**

### **1.1 Chemicals and materials**

All the analytical reagent-grade chemicals were used as received, without purification. Nickel(II) nitrate hexahydrate ( $\text{Ni}(\text{NO}_3)_2 \cdot 6\text{H}_2\text{O}$ ;  $\geq 99$ ), Copper(II) nitrate trihydrate ( $\text{Cu}(\text{NO}_3)_2 \cdot 3\text{H}_2\text{O}$ ;  $\geq 98\%$ ), urea ( $\text{CO}(\text{NH}_2)_2$ ; 99.0-100.5%), poly(vinylidene fluoride) (PVDF; average Mw  $\sim 534,000$  by GPC), N-methyl-2-pyrrolidone (NMP;  $\geq 99\%$ ), and potassium hydroxide (KOH;  $\geq 99.95\%$  trace metals basis) were purchased from Sigma-Aldrich MerCK, Seoul, South Korea. Ethanol

(DUKSAN Reagents and Chemicals, extra pure 99.9%). Nickel foam (MTI Korea, Seoul, South Korea, 99.95%), HCl (Sigma Aldrich Merck, ACS reagents, Seoul, South Korea, 37%), acetone (DUKSAN Reagents and Chemicals, Gyeonggi-do, Gyeonggi-do, South Korea, extra pure 99.9%), carbon black (DENKA BLACK, Highly purified and extremely conductive acetylene black, Kyoto, Japan).

## **1.2 Physicochemical CuO/NiO composite characterizations**

The crystallinity and phase formation of the pristine NiO and NiO/CuO composite samples were investigated using an X-ray diffractometer (PANalytical X-Pert Pro) operating at 40 kV and 30 mA with Cu K $\alpha$  radiation ( $\lambda = 1.540 \text{ \AA}$ ). The sample surface morphologies were examined using field-emission scanning electron microscopy (FESEM, S-4800, Hitachi, Japan), while elemental mapping was conducted via an X-ray column integrated with the FESEM system. High-resolution transmission electron microscopy (HRTEM, Tecnai G2 F20 S-Twin, USA) was performed for NiO/CuO Composite. The chemical composition and oxidation states of the samples were characterized by X-ray photoelectron spectroscopy (XPS, K-alpha, Thermo Scientific, USA) and the data were processed using Thermo Scientifics Avantage software (version 5.932). Nitrogen adsorption–desorption isotherms of pristine NiO and NiO/CuO composite were obtained using a 3-Flex surface analyzer (Micromeritics, USA).

## **1.3 Electrode preparation**

Nickel (Ni) foam was used as the current collector for the deposition of the active electrode material. Before applying the working electrode to a  $2.5 \times 1 \text{ cm}^2$  piece of Ni foam, the foam underwent a thorough cleaning procedure via ultrasonication in 1 M hydrochloric acid (HCl), deionized water, and absolute ethanol for 5 minutes each to remove any surface oxide layers.

Following this, the foam was dried at 70 °C for overnight. A mixture of the synthesized active materials, polyvinylidene fluoride (PVDF) as a binder, and carbon black to enhance conductivity, was prepared in a weight ratio of 80:10:10. This blend was then dispersed in 0.5 mL of N-methyl-2-pyrrolidone (NMP). The resulting slurry was drop-cast evenly onto the pre-cleaned Ni foam, covering an area of  $1.5 \times 1 \text{ cm}^2$ , and left to dry at 80 °C overnight. Finally, a pressure of 10 MPa was applied to ensure a uniform thin film of the active material. The mass loading of the electrode material was approximately 3.5 mg, optimizing it for electrochemical performance comparison.

#### 1.4 Electrochemical characterization

All electrochemical tests were performed at room temperature using a Bio-Logic electrochemical workstation equipped with EC-Lab software (version V11.36). The electrochemical setup comprised a Hg/HgO reference electrode, a platinum mesh counter electrode, and nickel foam coated with the active material as the working electrode. A 6 M KOH aqueous solution was used as the electrolyte. To assess the electrochemical properties of the synthesized samples, cyclic voltammetry (CV), galvanostatic charge-discharge (GCD), and electrochemical impedance spectroscopy (EIS) measurements were carried out. The specific capacity ( $C_s$ ;  $\text{C g}^{-1}$ ) of the electrodes was calculated using the equation:

$$C_s = \frac{I\Delta t}{m} \text{ C g}^{-1}$$

In this equation,  $I$  ( $\text{A g}^{-1}$ ) denotes the applied current density,  $\Delta t(\text{s})$  indicates the discharge time, and  $m(\text{g})$  represents the mass of the active electrode materials.

## 2. Results and discussion

Pure CuO was synthesized following the same procedure used for NiO, with  $\text{Ni}(\text{NO}_3)_2 \cdot 6\text{H}_2\text{O}$  replaced by  $\text{Cu}(\text{NO}_3)_2 \cdot 3\text{H}_2\text{O}$ . The obtained sample was characterized using XRD, and the corresponding diffraction pattern is presented in **Figure S2**. The XRD pattern displays characteristic peaks at  $2\theta$  values of  $32.60^\circ$ ,  $35.51^\circ$ ,  $38.74^\circ$ ,  $46.33^\circ$ ,  $48.85^\circ$ ,  $53.61^\circ$ ,  $58.42^\circ$ ,  $61.44^\circ$ ,  $66.38^\circ$ , and  $68.14^\circ$ , which are indexed to the (110), ( $-111$ ), (200), ( $-112$ ), ( $-202$ ), (020), (202), ( $-113$ ), ( $-311$ ), and (220) planes, respectively, of monoclinic CuO (JCPDS card no. 00-041-0254, space group C2/c). This confirms the successful formation of phase-pure CuO. Additionally, few peaks observed at  $36.48^\circ$  and  $42.35^\circ$ , corresponding to the (111) and (200) planes of cubic  $\text{Cu}_2\text{O}$  (JCPDS card no. 01-078-2076, space group Pn-3m), indicate the presence of a secondary  $\text{Cu}_2\text{O}$  phase, resulting in a CuO/ $\text{Cu}_2\text{O}$  composite.

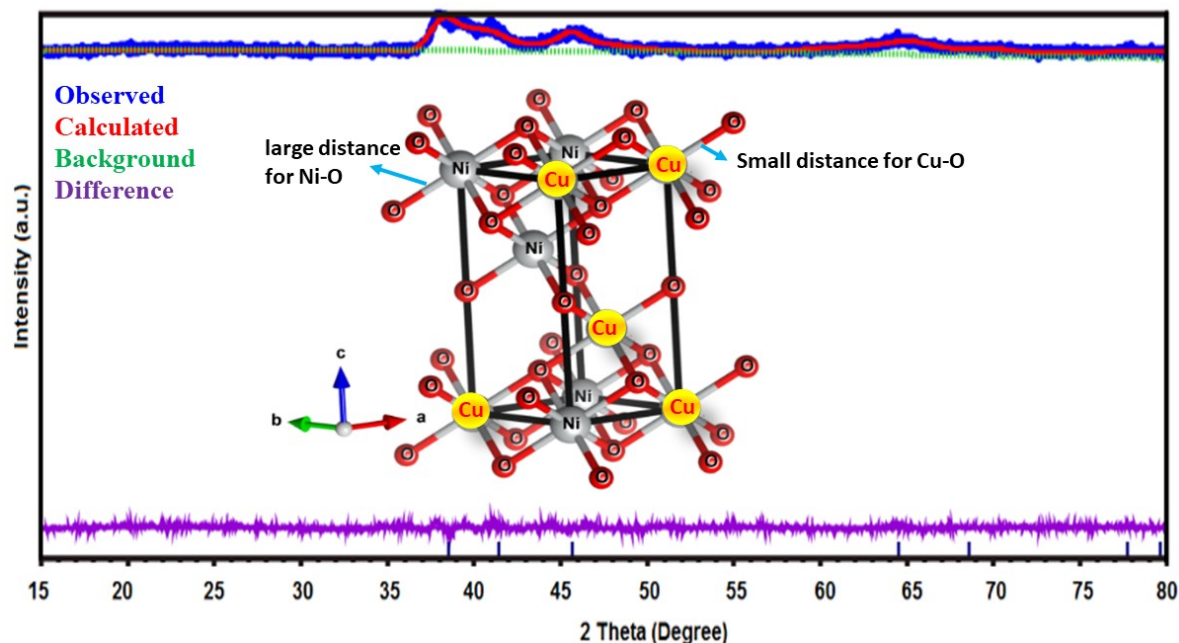

**Figure S1.** Rietveld refinement of the XRD spectra for the NiO/CuO composite. The inset of structural diagrams was generated using the refinement parameters provided in **Table 1**. In the ball-and-stick model, the gray, red and orange spheres represent Ni and O atoms, respectively.

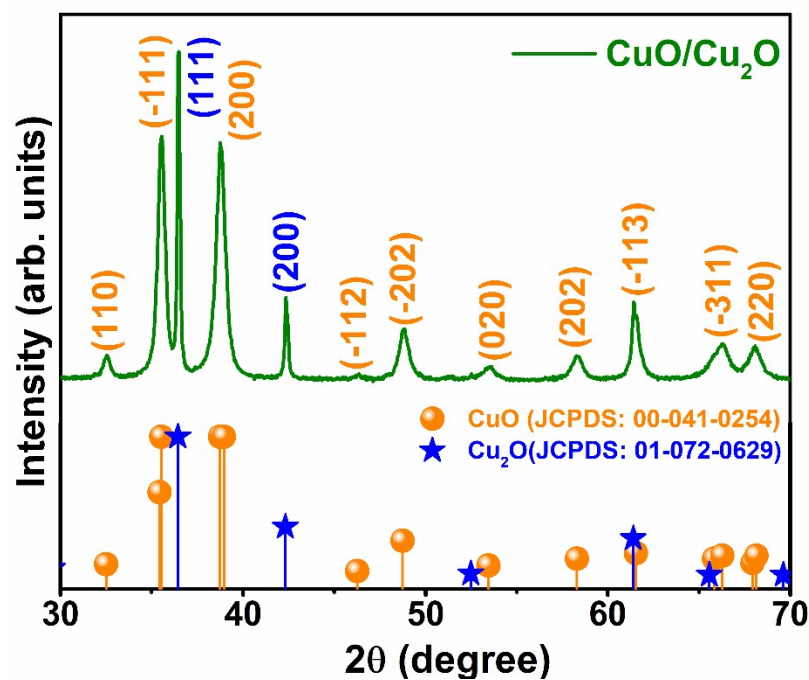

**Figure S2.** XRD pattern of the as-synthesized CuO/Cu<sub>2</sub>O sample.

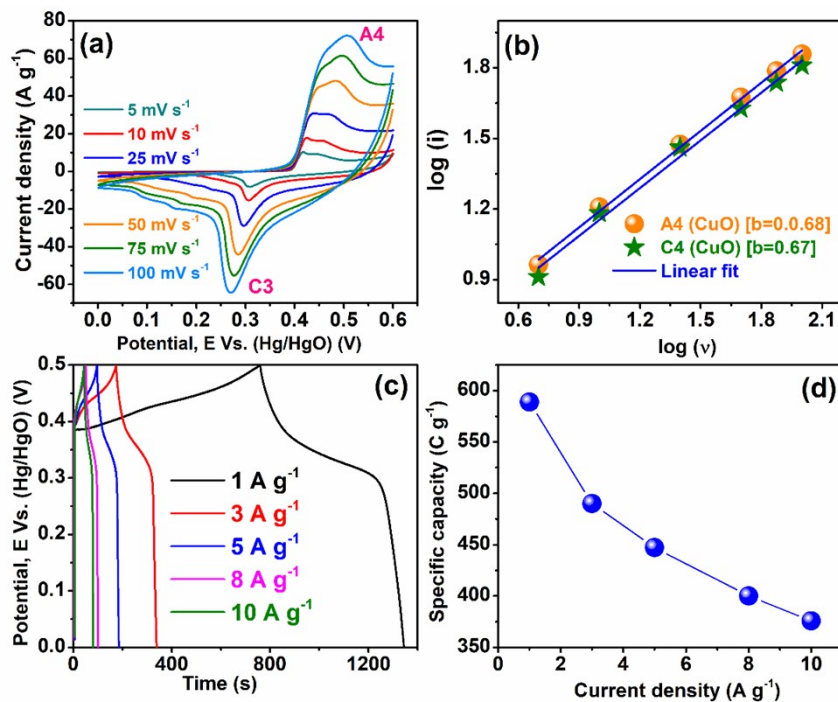

**Figure S3.** Electrochemical performance of the CuO/Cu<sub>2</sub>O electrode: (a) CV curves at various scan rates, (b)  $\log(i)$  vs.  $\log(v)$  plot, (c) GCD curves at different current densities, and (d) specific capacity as a function of current density.
